# Supplementary material for: Absolute and relative GFR and contrast medium dose/GFR ratio: cornerstones when predicting the risk of acute kidney injury
Source: PubMed Central journal article supplement (PMC10791854; doi:10.1007/s00330-023-09962-w), 2023-08-04
Supplement: 330_2023_9962_MOESM1_ESM.pdf [file 330_2023_9962_MOESM1_ESM.pdf]

**Absolute and relative GFR and contrast medium dose/GFR ratio.  
Corner stone's when predicting the risk of acute kidney injury**

**Electronic supplementary material**

**Table S1.** Studies evaluating contrast medium dose/GFR ratio as a significant and independent predictor of post contrast medium-induced acute kidney injury following percutaneous coronary angiography or interventions. Studies in upper part based on absolute GFR estimated by the Cockcroft-Gault equation (non-standardized creatinine assays) and lower part based on relative GFR estimated by equations using creatinine assays traceable to international standards except for 186-MDRD.

**Table S2.** Contrast medium dose/GFR ratio as a significant and independent predictor of post contrast medium-induced acute kidney injury following percutaneous coronary angiography or interventions. Weighted mean value with individual study sizes as weights calculated based on log-transformation of contrast-volume/GFR and gram-iodine/GFR ratio. Studies in upper part based on absolute GFR estimated by the Cockcroft-Gault equation (non-standardized creatinine assays) and lower part based on relative GFR estimated by equations using creatinine assays traceable to international standards except for 186-MDRD.

**Table S1.**

| First author        | Country  | Year | Indication                    | Study design                 | AKI definition*    | eGFR equations | Mean eGFR |
|---------------------|----------|------|-------------------------------|------------------------------|--------------------|----------------|-----------|
| Laskey (8)          | USA      | 2007 | PCI, unselected               | Retrospective registry study | >0.5 mg/dL         | Abs CG         | 87±38     |
| Nyman (9)           | Sweden   | 2008 | PCI, STEMI                    | Retrospective                | ≥44.2 μmol/L       | Abs CG         | 75 ±25    |
| Amiri (28)          | Iran     | 2018 | PCA or PCI, elective w/o MetS | Prospective                  | ≥0.5 mg/dL or ≥25% | Abs CG         | 82 ±25    |
| Amiri (28)          | Iran     | 2018 | PCA or PCI, elective w. MetS  | Prospective                  | ≥0.5 mg/dL or ≥25% | Abs CG         | 82 ±26    |
| Barbieri (29)       | Italy    | 2016 | PCA or PCI (48%)              | Retrospective registry study | ≥0.5 mg/dL or ≥25% | Abs CG         | 71        |
| Khalil (30)         | Egypt    | 2018 | PCI, sCr <1,5 mg/dL           | Retrospective                | ≥0.5 mg/dL or ≥25% | Abs CG         | 95        |
| Liu (31)            | China    | 2015 | PCA or PCI, unselected        | Prospective                  | >0.5 mg/dL         | Abs CG         | 72 ±27    |
| Worasuwannarak (32) | Thailand | 2010 | CC or PCI, elective diabetics | Prospective                  | ≥0.5 mg/dL or ≥25% | Abs CG         | 61±27     |
| Abe (33)            | Japan    | 2014 | PCI, stable angina            | Retrospective registry study | ≥0.5 mg/dL or ≥25% | Rel Jap MDRD   | 66±18     |
| Ando (34)           | Italy    | 2014 | PCI, STEMI                    | Prospective                  | ≥0.5 mg/dL or ≥25% | Rel MDRD       | 91 ±32    |
| Celik (35)          | Turkey   | 2015 | PCI, STEMI                    | Prospective                  | ≥0.3 mg/dL         | Rel 175-MDRD   | 90.7      |
| Kim (36)            | Korea    | 2014 | PCI, CKD                      | Retrospective registry study | ≥0.5 mg/d or, ≥25% | Rel 175-MDRD   | 38.7      |
| Nie (37)            | China    | 2021 | PCA or PCI (60%)              | Prospective MC               | ≥0.5 mg/dL         | Rel CKD-EPI    | NR        |
| Nozue (38)          | Japan    | 2009 | PCI, elective stable angina   | Retrospective                | >0.5 mg/dL, >25%   | Rel Jap MDRD   | 55 ±22    |
| Yoon (39)           | Korea    | 2011 | PCI, elective                 | Prospective                  | >0.5 mg/dL or >25% | Rel 186-MDRD   | 62.8      |

\*Serum creatinine rise.

AKI = acute kidney injury, CC = cardiac catheterization, CKD = chronic kidney disease, MC = multicentre, MetS = metabolic syndrome, NR = not reported, PCA = percutaneous coronary angiography, PCI = percutaneous coronary intervention, sCr = serum creatinine, STEMI = ST-elevated myocardial infarction.

eGFR = estimated glomerular filtration rate, Abs = absolute GFR values in mL/min, Jap = Japanese, Rel = relative GFR values in mL/min/1.73 m<sup>2</sup>, CG = Cockcroft-Gault, CKD-EPI = Chronic Kidney Disease Epidemiology Collaboration equation, MDRD = Modification of Diet in Renal Disease study equation with coefficient 175 (standardized) and 186 (non-standardized, respectively).

**Table S2.**

| First author         | Total number | PC-AKI incidence | CM volume/ GFR ratio | CM conc | Gram I/ GFR ratio | AUC                    | Sensitivity | Specificity | Adjusted odds ratio | PC-AKI <ratio | PC-AKI ≥ratio |
|----------------------|--------------|------------------|----------------------|---------|-------------------|------------------------|-------------|-------------|---------------------|---------------|---------------|
| Laskey (8)           | 3179         | 1.5%             | 3.7                  | 350*    | 1.30§             | 0.690                  | 65%         | 75%         | 3.84<br>(2.01-7.34) | NR            | NR            |
| Nyman (9)            | 391          | 16.6%            | 2.9                  | 350     | 1.00              | 0.800                  | NR          | NR          | NR                  | 3%            | 25%           |
| Amiri (28)           | 125          | 14.4%            | 2.0#                 | 320     | 0.63              | 0.729<br>(0.649-0.826) | 72%         | 74%         | 3.92<br>(1.8-8.52)  | 6%            | 32%           |
| Amiri (28)           | 130          | 39.2%            | 1.6#                 | 320     | 0.51              | 0.738<br>(0.649-0.826) | 68%         | 73%         | 3.92<br>(1.8-8.52)  | 22%           | 63%           |
| Barbieri (29)        | 2308         | 12.2%            | 6.15                 | 350*    | 2.15§             | NR                     | 34%         | 86%         | 1.81<br>(1.19-2.76) | 9.7%          | 25%           |
| Khalil (30)          | 314          | 10.8%            | 2.86                 | 350*    | 1.00§             | 0.887                  | 85.30       | 79.60       | 25.1<br>(8.5-74.2)  | NR            | NR            |
| Liu (31)             | 3273         | 2.6%             | 2.44                 | 370     | 0.90§             | 0.780                  | 73%         | 70%         | 4.16<br>(2.45-7.06) | 1.0%          | 6.3%          |
| Worasu-wannarak (32) | 248          | 5.2%             | 2.6                  | 370*    | 0.98              | NR                     | NR          | NR          | 5.8<br>(1.7-19.4)   | NR            | NR            |
| <i>Subtotal</i>      | <i>9968</i>  |                  | <i>3.47†</i>         |         |                   | <i>1.24†</i>           |             |             |                     |               |               |
| Abe (33)             | 1222         | 4.2%             | 3.0                  | 350     | 1.05§             | NR                     | NR          | NR          | 2.07<br>(1.01-4.26) | 3.1%          | 6.1%          |
| Ando (34)            | 470          | 5.3%             | 2.5                  | 385*    | 0.96§             | 0.77<br>(0.66-0.87)    | 72%         | 78%         | 5.6<br>(1.9-15.4)   | NR            | NR            |
| Celik (35)           | 597          | 13.1%            | 2.0                  | 350*    | 0.70§             | 0.786<br>(0.729-0.844) | 70%         | 78%         | 5.9<br>(2.8-12.3)   |               |               |
| Kim (36)             | 297          | 18.5%            | 6.0                  | 350*    | 2.10§             | 0.620                  | 53%         | 72%         | NR                  | NR            | NR            |
| Nie (37)             | 4254         | 1.7%             | 1.78                 | 350*    | 0.62§             | 0.736<br>(0.670-0.803) | 61%         | 75%         | 2.66<br>(1.50-4.72) | NR            | NR            |
| Nozue (38)           | 60           | 13.3%            | 5.1                  | 370     | 1.89§             | 0.839                  | 88%         | 75%         | NR                  | NR            | NR            |
| Yoon (39)            | 226          | 7.1%             | 4.2#                 | 335*    | 1.42              | 0.867                  | 81%         | 80%         | 9.79<br>(3.40-28.2) | 1.8%          | 24%           |
| <i>Subtotal</i>      | <i>7126</i>  |                  | <i>2.19†</i>         |         |                   | <i>0.77†</i>           |             |             |                     |               |               |
| <i>Total</i>         | <i>17094</i> |                  | <i>2.86†</i>         |         |                   | <i>1.02†</i>           |             |             |                     |               |               |

\*Anticipated mean concentration, #Calculated based upon CM concentration and reported gram-iodine/GFR ratio, §Calculated based upon CM concentration and reported CM-volume/GFR ratio, †Weighted mean value.

AUC = Receiver-operating characteristic curve analysis to determine the best cut-off point for CM-dose/GFR ratio to predict PC-AKI with area under the curve (AUC) as a measure of its accuracy. Adjusted odds ratio of CM-dose/GFR ratio as a predictor of PC-AKI.

CM = contrast medium, GFR = glomerular filtration rate, I = iodine, PC-AKI = post contrast medium-induced acute kidney injury.

## References

8. Laskey WK, Jenkins C, Selzer F, et al (2007) Volume-to-creatinine clearance ratio: a pharmacokinetically based risk factor for prediction of early creatinine increase after percutaneous coronary intervention. *J Am Coll Cardiol* 50:584-590
9. Nyman U, Björk J, Aspelin P, Marenzi G (2008) Contrast medium dose-to-GFR ratio: A measure of systemic exposure to predict contrast-induced nephropathy after percutaneous coronary intervention. *Acta Radiol* 49:658-667
28. Amiri A, Ghanavati R, Riahi Beni H, Sezavar SH, Sheykhvatan M, Arab M (2018) Metabolic Syndrome and the Iodine-Dose/Creatinine Clearance Ratio as Determinants of Contrast-Induced Acute Kidney Injury. *Cardiorenal Med* 8:217-227
29. Barbieri L, Verdoia M, Marino P, Suryapranata H, De Luca G (2016) Contrast volume to creatinine clearance ratio for the prediction of contrast-induced nephropathy in patients undergoing coronary angiography or percutaneous intervention. *Eur J Prev Cardiol* 23:931-937
30. Khalil WA, El-Awady W, El-Menshaway MD, Emad M (2018) The early detection and prevention of contrast induced nephropathy post coronary intervention in catheterization unit. *J Ind Coll cardiol* 8:157-161
31. Liu Y, Chen JY, Tan N, et al (2015) Safe limits of contrast vary with hydration volume for prevention of contrast-induced nephropathy after coronary angiography among patients with a relatively low risk of contrast-induced nephropathy. *Circ Cardiovasc Interv* 8
32. Worasuwannarak S, Pornratanarangsi S (2010) Prediction of contrast-induced nephropathy in diabetic patients undergoing elective cardiac catheterization or PCI: role of volume-to-creatinine clearance ratio and iodine dose-to-creatinine clearance ratio. *J Med Assoc Thai* 93 Suppl 1:S29-34
33. Abe D, Sato A, Hoshi T, et al (2014) Clinical predictors of contrast-induced acute kidney injury in patients undergoing emergency versus elective percutaneous coronary intervention. *Circ J* 78:85-91
34. Ando G, de Gregorio C, Morabito G, Trio O, Saporito F, Oreto G (2014) Renal function-adjusted contrast volume redefines the baseline estimation of contrast-induced acute kidney injury risk in patients undergoing primary percutaneous coronary intervention. *Circ Cardiovasc Interv* 7:465-472
35. Celik O, Ozturk D, Akin F, et al (2015) Association Between Contrast Media Volume-Glomerular Filtration Rate Ratio and Contrast-Induced Acute Kidney Injury After Primary Percutaneous Coronary Intervention. *Angiology* 66:519-524
36. Kim JH, Yang JH, Choi SH, et al (2014) Predictors of outcomes of contrast-induced acute kidney injury after percutaneous coronary intervention in patients with chronic kidney disease. *Am J Cardiol* 114:1830-1835
37. Nie Z, Liu Y, Wang C, Sun G, Chen G, Lu Z (2021) Safe Limits of Contrast Media for Contrast-Induced Nephropathy: A Multicenter Prospective Cohort Study. *Front Med (Lausanne)* 8:701062

38. Nozue T, Michishita I, Iwaki T, Mizuguchi I, Miura M (2009) Contrast medium volume to estimated glomerular filtration rate ratio as a predictor of contrast-induced nephropathy developing after elective percutaneous coronary intervention. *J Cardiol* 54:214-220
39. Yoon HJ, Hur SH (2011) Determination of safe contrast media dosage to estimated glomerular filtration rate ratios to avoid contrast-induced nephropathy after elective percutaneous coronary intervention. *Korean Circ J* 41:265-271
